# Supplementary material
Source: PubMed Central journal article supplement (PMC3753918)
Supplement: MCB.01597-12_zmb999100067so1.pdf [file MCB.01597-12_zmb999100067so1.pdf]

## Supplementary information

**Table S1.** Analysis of thyroid tumors developed in mice of the indicated genotypes

| Genotype                                             | AE (months) | N  | MD        | CEA (%)    | Ki67 (%)   |
|------------------------------------------------------|-------------|----|-----------|------------|------------|
| <i>Rb</i> <sup>+/+</sup> ; <i>ATM</i> <sup>+/+</sup> | 12.8 ± 1.2  | 7  | ND        | 1.5 ± 0.5  | 1.5 ± 0.3  |
| <i>Rb</i> <sup>+/+</sup> ; <i>ATM</i> <sup>-/-</sup> | 9.4 ± 1.4   | 8  | ND        | 1.2 ± 0.4  | 1.2 ± 0.4  |
| <i>Rb</i> <sup>+/-</sup> ; <i>ATM</i> <sup>+/+</sup> | 12.5 ± 1.5  | 12 | 1.5 ± 0.3 | 1.7 ± 0.5  | 3.5 ± 0.2  |
| <i>Rb</i> <sup>+/-</sup> ; <i>ATM</i> <sup>+/-</sup> | 7.1 ± 1.3   | 15 | 9.3 ± 0.5 | 93.6 ± 1.2 | 61.1 ± 1.2 |
| <i>Rb</i> <sup>+/-</sup> ; <i>ATM</i> <sup>-/-</sup> | 5.4 ± 1.3   | 6  | 7.8 ± 0.6 | 96.3 ± 1.4 | 52.3 ± 1.3 |

Data shown include average age at examination (AE), number of thyroids examined (N), mean diameter of tumors (MD), and percentage of CEA-, and Ki67-positive cells included in the samples. Data are shown as average ± SEM. ND: not detected.

**Table S2.** Sequence of the primers used for bisulfite PCR of the *Ink4a* promoter

| Primer                 | Sequence                            |
|------------------------|-------------------------------------|
| Unmethylation specific |                                     |
| Forward                | 5' CGATTGGGCGGGTATTGAATTTTCGC-      |
| Reverse                | 3' -CACGTCATACACACGACCCTAAACCG-     |
| Methylation-specific   |                                     |
| Forward                | 5' GTGATTGGGTGGGTATTGAATTTTGTG-     |
| Reverse                | 3' -CACACATCATACACACAACCCTAAACCA-3' |

**Table S3.** Sequence of the primers used for RT-PCR

| Gene         | Sequence                    |
|--------------|-----------------------------|
| <i>Ink4a</i> |                             |
| Forward      | 5' -TCTGGAGCAGCATGGAGTCC-3' |
| Reverse      | 5' -TCGCAGTTCGAATCTGCACC-3' |

*DNMT1*

|         |                             |
|---------|-----------------------------|
| Forward | 5' -GAGGAAGGCTACCTGGCTAA-3' |
| Reverse | 5' -AGTGAGAGTGTGTGTTCCGT-3' |

---

**Table S4.** Sequence of the primers used for bisulfite sequencing

| Gene          | Sequence                         |
|---------------|----------------------------------|
| <i>Ink4a</i>  |                                  |
| Outer PCR     |                                  |
| Forward       | 5' -GTTGTGTATAGAATTTTAGTATTG-3'  |
| Reverse       | 5' -AAATAAAACACTCCTTACCTAC-3'    |
| Inner PCR     |                                  |
| Forward       | 5' -TTTTAATATTTGGGTGTTGTATTG-3'  |
| Reverse       | 5' -CCACCCTAACCAATCTATCTACAAC-3' |
| <i>Shc2</i>   |                                  |
| Outer PCR     |                                  |
| Forward       | 5' -GGGTAGGATATGATTGAACGTG-3'    |
| Reverse       | 5' -CGAAAAACCCCGACTAAACC-3'      |
| Inner PCR     |                                  |
| Forward       | 5' -GGTAGGATGTTGTTGGAATAGT-3'    |
| Reverse       | 5' -AAAACACTACTCCTAAAACCCC-3'    |
| <i>Noggin</i> |                                  |
| Outer PCR     |                                  |
| Forward       | 5' -GAAAATGTTTTATGTATATGGAGAA-3' |
| Reverse       | 5' -CCACTTCTCTCTACCTACTCCGAAC-3' |
| Inner PCR     |                                  |
| Forward       | 5' -TGGTTTTAGCGTCGTTACGAGT-3'    |
| Reverse       | 5' -CTACTCCGAACAACGCAACC-3'      |
| <i>FoxO6</i>  |                                  |
| Outer PCR     |                                  |
| Forward       | 5' -TATTTCGACGGTCGGGGTTTA-3'     |
| Reverse       | 5' -CCCCTACCGAACTCGAAAA-3'       |
| Inner PCR     |                                  |
| Forward       | 5' -GTATAGAGAATAGGTAGGGTTGTGG-3' |
| Reverse       | 5' -TTCAAAAATTCTCCCAA-3'         |

**Table S5.** Sequence of the primers used for ChIP assay

| Gene            | Sequence                         |
|-----------------|----------------------------------|
| <i>Ink4a</i>    |                                  |
| ChIP            |                                  |
| Outer PCR       |                                  |
| OUTF1           | 5' -GATGACACAATTTTCTGCTAAGATG-3' |
| OUTR2           | 5' -AAAGAGTTCGGGGCGTTG-3'        |
| Inner PCR       |                                  |
| Proximal region |                                  |
| PRXF3           | 5' -AAGGAAGGAGGGACCCACT-3'       |
| PRXR4           | 5' -CCTGGCCAGTCTGTCTGC-3'        |
| Middle region   |                                  |
| MDLF5           | 5' -TCCTGAACCCTGCATCTCTT-3'      |
| MDLR6           | 5' -CACACTCTGCTCCTGACCTG-3'      |
| Distal region   |                                  |
| DSTF7           | 5' -TTCTAATACCTGGGTGTTGCAC-3'    |
| DSTR8           | 5' -GAAGAGATGCAGGGTTCAGG-3'      |
| qChIP           |                                  |
| AS109F          | 5' -AAGGAAGGAGGGACCCACT-3'       |
| AS109R          | 5' -GACTCCATGCTGCTCCAGAT-3'      |

**Table S6.** List of the commonly upregulated genes in 2 independent microarray experiments

| Gene Symbol   | Full name from nomenclature authority | Genbank Accession |
|---------------|---------------------------------------|-------------------|
| 1100001G20Rik | RIKEN cDNA 1100001G20 gene            | NM_183249         |
| 1700003E16Rik | RIKEN cDNA 1700003E16 gene            | NM_027948         |
| 2210011C24Rik | RIKEN cDNA 2210011C24 gene            | XM_985599         |
| 2310040G24Rik | RIKEN cDNA 2310040G24 gene            | XM_001479091      |
| 2410075B13Rik | RIKEN cDNA 2410075B13 gene            | NM_001163518      |
| 2610019F03Rik | RIKEN cDNA 2610019F03 gene            | NM_173744         |
| 3830403N18Rik | RIKEN cDNA 3830403N18 gene            | NM_027510         |
| 4930522L14Rik | RIKEN cDNA 4930522L14 gene            | XR_035683         |
| 4930583H14Rik | RIKEN cDNA 4930583H14 gene            | NM_026358         |
| 4932425I24Rik | RIKEN cDNA 4932425I24 gene            | NM_001081025      |

|               |                                                                                                |              |
|---------------|------------------------------------------------------------------------------------------------|--------------|
| 4933400F03Rik |                                                                                                | AK016591     |
| 4933439C10Rik | RIKEN cDNA 4933439C10 gene                                                                     | NR_015585    |
| 5430435G22Rik | RIKEN cDNA 5430435G22 gene                                                                     | NM_145509    |
| 6720401G13Rik | RIKEN cDNA 6720401G13 gene                                                                     | NR_026976    |
| 9830001H06Rik | RIKEN cDNA 9830001H06 gene                                                                     | NM_001164663 |
| Actg2         | actin, gamma 2, smooth muscle, enteric                                                         | NM_009610    |
| Acy3          | aspartoacylase (aminoacylase) 3                                                                | NM_027857    |
| Adam23        | a disintegrin and metallopeptidase domain 23                                                   | NM_011780    |
| Adamts15      | a disintegrin-like and metallopeptidase (reprolysin type) with thrombospondin type 1 motif, 15 | NM_001024139 |
| Adamts17      | a disintegrin-like and metallopeptidase (reprolysin type) with thrombospondin type 1 motif, 17 | NM_001033877 |
| Agap2         | ArfGAP with GTPase domain, ankyrin repeat and PH domain 2                                      | NM_001033263 |
| AI467606      | expressed sequence AI467606                                                                    | NM_178901    |
| Akr1c13       | aldo-keto reductase family 1, member C13                                                       | NM_013778    |
| Alox5         | arachidonate 5-lipoxygenase                                                                    | NM_009662    |
| Amigo1        | adhesion molecule with Ig like domain 1                                                        | NM_146137    |
| Amn           | Amnionless                                                                                     | NM_033603    |
| Amz1          | archaelysin family metallopeptidase 1                                                          | NM_173405    |
| Ankrd2        | ankyrin repeat domain 2 (stretch responsive muscle)                                            | NM_020033    |
| Ankrd37       | ankyrin repeat domain 37                                                                       | NM_001039562 |
| Aoc3          | amine oxidase, copper containing 3                                                             | NM_009675    |
| Apobr         | apolipoprotein B receptor                                                                      | NM_138310    |
| Apod          | apolipoprotein D                                                                               | NM_007470    |
| Apol10b       | apolipoprotein L 10b                                                                           | NM_177820    |
| Arhgap9       | Rho GTPase activating protein 9                                                                | NM_146011    |
| Atp10d        | ATPase, class V, type 10D                                                                      | NM_153389    |
| Atp1b2        | ATPase, Na <sup>+</sup> /K <sup>+</sup> transporting, beta 2 polypeptide                       | NM_013415    |
| Atp2a3        | ATPase, Ca <sup>++</sup> transporting, ubiquitous                                              | NM_001163337 |
| Atp6ap11      | ATPase, H <sup>+</sup> transporting, lysosomal accessory protein 1-like                        | NM_001145879 |
| B3gnt8        | UDP-GlcNAc:betaGal beta-1,3-N-acetylglucosaminyltransferase 8                                  | NM_146184    |
| Batf2         | basic leucine zipper transcription factor, ATF-like 2                                          | NM_028967    |
| BC026762      | cDNA sequence BC026762                                                                         | XM_001480912 |
| BC039966      | cDNA sequence BC039966                                                                         | XM_001474172 |
| BC061194      | cDNA sequence BC061194                                                                         | NM_001001334 |
| Bglap-rs1     | bone gamma-carboxylglutamate protein, related sequence 1                                       | NM_031368    |
| Birc7         | baculoviral IAP repeat-containing 7 (livin)                                                    | NM_001163247 |
| Bnip3         | BCL2/adenovirus E1B interacting protein 3                                                      | NM_009760    |
| Bok           | BCL2-related ovarian killer protein                                                            | NM_016778    |
| C130050018Rik | RIKEN cDNA C130050018 gene                                                                     | NM_177000    |
| C1qI3         | C1q-like 3                                                                                     | NM_153155    |
| C530028021Rik | RIKEN cDNA C530028021 gene                                                                     | NM_175696    |
| Cacng7        | calcium channel, voltage-dependent, gamma subunit 7                                            | NM_133189    |
| Cadm4         | cell adhesion molecule 4                                                                       | NM_153112    |
| Calr4         | calreticulin 4                                                                                 | NM_001033226 |

|               |                                                                                 |              |
|---------------|---------------------------------------------------------------------------------|--------------|
| Camk2b        | calcium/calmodulin-dependent protein kinase II, beta                            | NM_001174053 |
| Capn3         | calpain 3                                                                       | NM_007601    |
| Car6          | carbonic anhydrase 6                                                            | NM_009802    |
| Casp1         | caspase 1                                                                       | NM_009807    |
| Ccr11         | chemokine (C-C motif) receptor-like 1                                           | AY072938     |
| Cdhr1         | cadherin-related family member 1                                                | NM_130878    |
| Cdsn          | Corneodesmosin                                                                  | NM_001008424 |
| Chst15        | carbohydrate (N-acetylgalactosamine 4-sulfate 6-O) sulfotransferase 15          | NM_029935    |
| Cited1        | Cbp/p300-interacting transactivator with Glu/Asp-rich carboxy-terminal domain 1 | NM_007709    |
| Clca6         | chloride channel calcium activated 6                                            | NM_207208    |
| Clstn3        | calsyntenin 3                                                                   | NM_153508    |
| Col15a1       | collagen, type XV, alpha 1                                                      | NM_009928    |
| Col5a3        | collagen, type V, alpha 3                                                       | NM_016919    |
| Col6a4        | collagen, type VI, alpha 4                                                      | NM_026763    |
| Col9a3        | collagen, type IX, alpha 3                                                      | NM_009936    |
| Cox6a2        | cytochrome c oxidase, subunit VI a, polypeptide 2                               | NM_009943    |
| Cp            | ceruloplasmin                                                                   | NM_001042611 |
| Crb2          | crumbs homolog 2 (Drosophila)                                                   | NM_001163566 |
| Creb3l3       | cAMP responsive element binding protein 3-like 3                                | NM_145365    |
| Crispld2      | cysteine-rich secretory protein LCCL domain containing 2                        | NM_030209    |
| Csdc2         | cold shock domain containing C2, RNA binding                                    | NM_145473    |
| Ctsk          | cathepsin K                                                                     | NM_007802    |
| Cyfp2         | cytoplasmic FMR1 interacting protein 2                                          | NM_133769    |
| Cyp2c55       | cytochrome P450, family 2, subfamily c, polypeptide 55                          | NM_028089    |
| Cys1          | cystin 1                                                                        | NM_138686    |
| D430040L24Rik | RIKEN cDNA D430040L24 gene                                                      | AK085126     |
| Des           | desmin                                                                          | NM_010043    |
| Dlx4          | distal-less homeobox 4                                                          | NM_007867    |
| Dmkn          | dermokine                                                                       | NM_001166173 |
| Dmpk          | dystrophia myotonica-protein kinase                                             | NM_032418    |
| Dnajc22       | DnaJ (Hsp40) homolog, subfamily C, member 22                                    | NM_176835    |
| Dusp13        | dual specificity phosphatase 13                                                 | NM_001007268 |
| Ebf4          | early B-cell factor 4                                                           | NM_001110513 |
| Edn1          | endothelin 1                                                                    | NM_010104    |
| Edn2          | endothelin 2                                                                    | NM_007902    |
| EG666699      |                                                                                 | XM_989887    |
| Enpp1         | ectonucleotide pyrophosphatase/phosphodiesterase 1                              | AK014707     |
| Enpp1         | ectonucleotide pyrophosphatase/phosphodiesterase 1                              | NM_008813    |
| Epb4.9        | erythrocyte protein band 4.9                                                    | NM_013514    |
| Esrrb         | estrogen related receptor, beta                                                 | NM_001159500 |
| F8            | coagulation factor VIII                                                         | NM_007977    |
| Fam180a       | family with sequence similarity 180, member A                                   | NM_173375    |
| Fam20a        | family with sequence similarity 20, member A                                    | NM_153782    |
| Fam81a        | family with sequence similarity 81, member A                                    | NM_029784    |
| Fate1         | fetal and adult testis expressed 1                                              | NR_003243    |

|         |                                                                                             |              |
|---------|---------------------------------------------------------------------------------------------|--------------|
| Fcgr4   | Fc receptor, IgG, low affinity IV                                                           | NM_144559    |
| Foxa1   | forkhead box A1                                                                             | NM_008259    |
| Foxf2   | forkhead box F2                                                                             | NM_010225    |
| Foxo6   | forkhead box O6                                                                             | NM_194060    |
| Foxs1   | forkhead box S1                                                                             | NM_010226    |
| Fyb     | FYN binding protein                                                                         | NM_011815    |
| Gas6    | growth arrest specific 6                                                                    | NM_019521    |
| Gdf7    | growth differentiation factor 7                                                             | NM_013527    |
| Gfra2   | glial cell line derived neurotrophic factor family<br>receptor alpha 2                      | NM_008115    |
| Glipr1  | GLI pathogenesis-related 1 (glioma)                                                         | NM_028608    |
| Gm10220 | predicted gene 10220                                                                        | NM_001134299 |
| Gm10487 | predicted gene 10487                                                                        | NM_001100609 |
| Gm10639 | predicted gene 10639                                                                        | NM_001122660 |
| Gm16430 | predicted gene 16430                                                                        | NM_001166601 |
| Gm2012  | predicted gene 2012                                                                         | NM_001104946 |
| Gm2066  | predicted pseudogene 2066                                                                   | XM_001472346 |
| Gm2397  | predicted gene 2397                                                                         | XM_001473420 |
| Gm2659  | predicted gene 2659                                                                         | XM_001474258 |
| Gm3137  | predicted gene 3137                                                                         | XM_001477000 |
| Gm3586  |                                                                                             | XM_001477872 |
| Gm3697  | predicted gene 3697                                                                         | XM_001478221 |
| Gm3792  | predicted gene 3792                                                                         | XM_001478043 |
| Gm3916  | predicted gene 3916                                                                         | XM_001478609 |
| Gm41    | predicted pseudogene 41                                                                     | XM_111935    |
| Gm5168  | predicted gene 5168                                                                         | NM_001025607 |
| Gm5532  | predicted gene 5532                                                                         | AK147021     |
| Gm5604  | predicted gene 5604                                                                         | XR_004919    |
| Gm5622  | predicted gene 5622                                                                         | NM_001013816 |
| Gm5935  | predicted gene 5935                                                                         | NM_001081657 |
| Gm6664  | predicted gene 6664                                                                         | XR_035618    |
| Gm7676  | predicted gene 7676                                                                         | XM_977607    |
| Gm7967  | predicted gene 7967                                                                         | XM_991070    |
| Gm7999  | predicted gene 7999                                                                         | XM_982515    |
| Gm9732  | predicted gene 9732                                                                         | XM_001475911 |
| Gngt2   | guanine nucleotide binding protein (G protein),<br>gamma transducing activity polypeptide 2 | NM_001038664 |
| Gpha2   | glycoprotein hormone alpha 2                                                                | NM_130453    |
| Gpsm3   | G-protein signalling modulator 3 (AGS3-like, <i>C. elegans</i> )                            | NM_134116    |
| Grem1   | gremlin 1                                                                                   | NM_011824    |
| Grk4    | G protein-coupled receptor kinase 4                                                         | NM_019497    |
| Grtp1   | GH regulated TBC protein 1                                                                  | NM_025768    |
| Gsdmc   | gasdermin C                                                                                 | NM_031378    |
| Gsdmd   | gasdermin D                                                                                 | NM_026960    |
| Gsta2   | glutathione S-transferase, alpha 2 (Yc2)                                                    | NM_008182    |
| Gsta4   | glutathione S-transferase, alpha 4                                                          | NM_010357    |
| Gstm6   | glutathione S-transferase, mu 6                                                             | NM_008184    |
| H19     | H19 fetal liver mRNA                                                                        | NR_001592    |
| H2-DMb1 | histocompatibility 2, class II, locus Mb1                                                   | NM_010387    |
| H2-K1   | histocompatibility 2, K1, K region                                                          | NM_001001892 |

|              |                                                                                           |              |
|--------------|-------------------------------------------------------------------------------------------|--------------|
| Hba-a2       | hemoglobin alpha, adult chain 2                                                           | NM_001083955 |
| Heyl         | hairly/enhancer-of-split related with YRPW motif-like                                     | NM_013905    |
| Hmcn1        | hemicentin 1                                                                              | NM_001024720 |
| Hoxa7        | homeobox A7                                                                               | NM_010455    |
| Hpse         | heparanase                                                                                | NM_152803    |
| Hyal1        | hyaluronoglucosaminidase 1                                                                | NM_008317    |
| Ifi2711      | interferon, alpha-inducible protein 27 like 1                                             | NM_026790    |
| Ifi2712a     | interferon, alpha-inducible protein 27 like 2A                                            | NM_029803    |
| Ifitm1       | interferon induced transmembrane protein 1                                                | NM_001112715 |
| Ifitm6       | interferon induced transmembrane protein 6                                                | NM_001033632 |
| Inadl        | InaD-like (Drosophila)                                                                    | NM_172696    |
| Inadl        | InaD-like (Drosophila)                                                                    | NM_001005787 |
| Ins1         | insulin I                                                                                 | NM_008386    |
| Irf6         | interferon regulatory factor 6                                                            | NM_016851    |
| Itga10       | integrin, alpha 10                                                                        | NM_001081053 |
| Itga9        | integrin alpha 9                                                                          | NM_133721    |
| Itgb4        | integrin beta 4                                                                           | NM_001005608 |
| Kcnab1       | potassium voltage-gated channel, shaker-related subfamily, beta member 1                  | NM_010597    |
| Kcnmb4       | potassium large conductance calcium-activated channel, subfamily M, beta member 4         | NM_021452    |
| Kcnn4        | potassium intermediate/small conductance calcium-activated channel, subfamily N, member 4 | NM_008433    |
| Klk8         | kallikrein related-peptidase 8                                                            | NM_008940    |
| Krt14        | keratin 14                                                                                | NM_016958    |
| Krt7         | keratin 7                                                                                 | NM_033073    |
| db3          | LIM domain binding 3                                                                      | NM_011918    |
| Lgals2       | lectin, galactose-binding, soluble 2                                                      | NM_025622    |
| Lhx2         | LIM homeobox protein 2                                                                    | NM_010710    |
| Lims2        | LIM and senescent cell antigen like domains 2                                             | NM_144862    |
| Lmod1        | leiomodien 1 (smooth muscle)                                                              | NM_053106    |
| LOC100041034 |                                                                                           | XM_001475680 |
| LOC100041580 |                                                                                           | XM_001475945 |
| LOC100044874 |                                                                                           | XM_001473540 |
| LOC100047159 |                                                                                           | XM_001477549 |
| LOC100047598 |                                                                                           | XM_001478476 |
| LOC625953    |                                                                                           | XM_001480391 |
| LOC631151    |                                                                                           | XM_904876    |
| Lrrc15       | leucine rich repeat containing 15                                                         | NM_028973    |
| Lrrc17       | leucine rich repeat containing 17                                                         | NM_028977    |
| Lrrn4cl      | LRRN4 C-terminal like                                                                     | NM_001013019 |
| Marco        | macrophage receptor with collagenous structure                                            | NM_010766    |
| Matn4        | matrilin 4                                                                                | NM_013592    |
| Mc1r         | melanocortin 1 receptor                                                                   | NM_008559    |
| Me3          | malic enzyme 3, NADP(+)-dependent, mitochondrial                                          | NM_181407    |
| Mmp17        | matrix metalloproteinase 17                                                               | NM_011846    |
| Mr1          | major histocompatibility complex, class I-related                                         | NM_008209    |
| Mreg         | melanoregulin                                                                             | NM_001005423 |
| Murc         | muscle-related coiled-coil protein                                                        | NM_026509    |
| Myh6         | myosin, heavy polypeptide 6, cardiac muscle,                                              | NM_001164171 |

|            |                                                                                                                                 |              |
|------------|---------------------------------------------------------------------------------------------------------------------------------|--------------|
|            | alpha                                                                                                                           |              |
| Myom2      | myomesin 2                                                                                                                      | NM_008664    |
| Naip2      | NLR family, apoptosis inhibitory protein 2                                                                                      | NM_010872    |
| Naip6      | NLR family, apoptosis inhibitory protein 6                                                                                      | NM_010871    |
| Ncrna00085 | non-protein coding RNA 85                                                                                                       | NM_001162909 |
| Ndrp1      | N-myc downstream regulated gene 1                                                                                               | NM_008681    |
| Ndufa412   | NADH dehydrogenase (ubiquinone) 1 alpha subcomplex, 4-like 2                                                                    | NM_001098789 |
| Neur1a     | neuralized homolog 1A (Drosophila)                                                                                              | NM_021360    |
| Nkain3     | Na <sup>+</sup> /K <sup>+</sup> transporting ATPase interacting 3                                                               | NM_172987    |
| Nog        | noggin                                                                                                                          | NM_008711    |
| Nppb       | natriuretic peptide type B                                                                                                      | NM_008726    |
| Olf435     | olfactory receptor 435                                                                                                          | NM_146653    |
| Olf694     | olfactory receptor 694                                                                                                          | NM_146452    |
| Onecut2    | one cut domain, family member 2                                                                                                 | NM_194268    |
| Ophn1      | oligophrenin 1                                                                                                                  | NM_052976    |
| P2rx5      | purinergic receptor P2X, ligand-gated ion channel, 5                                                                            | NM_033321    |
| Pax3       | paired box gene 3                                                                                                               | NM_008781    |
| Pcp411     | Purkinje cell protein 4-like 1                                                                                                  | NM_025557    |
| Pde2a      | phosphodiesterase 2A, cGMP-stimulated                                                                                           | NM_001143848 |
| Pgm211     | phosphoglucomutase 2-like 1                                                                                                     | NM_027629    |
| Phex       | phosphate regulating gene with homologies to endopeptidases on the X chromosome (hypophosphatemia, vitamin D resistant rickets) | NM_011077    |
| Phkg1      | phosphorylase kinase gamma 1                                                                                                    | NM_011079    |
| Phldb3     | pleckstrin homology-like domain, family B, member 3                                                                             | NM_001102613 |
| Pla1a      | phospholipase A1 member A                                                                                                       | NM_134102    |
| Pla2g2e    | phospholipase A2, group IIE                                                                                                     | NM_012044    |
| Plac1      | placental specific protein 1                                                                                                    | NM_019538    |
| Plac8      | placenta-specific 8                                                                                                             | NM_139198    |
| Plb1       | phospholipase B1                                                                                                                | NM_001081407 |
| Plch2      | phospholipase C, eta 2                                                                                                          | NM_175556    |
| Plin4      | perilipin 4                                                                                                                     | NM_020568    |
| Plxna4     | plexin A4                                                                                                                       | NM_175750    |
| Plxnb3     | plexin B3                                                                                                                       | NM_019587    |
| Podn1      | podocan-like 1                                                                                                                  | NM_001013384 |
| Postn      | periostin, osteoblast specific factor                                                                                           | NM_015784    |
| Ppp1r14a   | protein phosphatase 1, regulatory (inhibitor) subunit 14A                                                                       | NM_026731    |
| Ppp4r4     | protein phosphatase 4, regulatory subunit 4                                                                                     | NM_028980    |
| Prm3       | protamine 3                                                                                                                     | NM_013638    |
| Prokr1     | prokineticin receptor 1                                                                                                         | NM_021381    |
| Prrt4      | proline-rich transmembrane protein 4                                                                                            | NM_001101443 |
| Prune2     | prune homolog 2 (Drosophila)                                                                                                    | NM_181348    |
| Psd        | pleckstrin and Sec7 domain containing                                                                                           | NM_028627    |
| Pthlh      | parathyroid hormone-like peptide                                                                                                | NM_008970    |
| Ptprb      | protein tyrosine phosphatase, receptor type, B                                                                                  | NM_029928    |
| Rab26      | RAB26, member RAS oncogene family                                                                                               | NM_177375    |
| Ralgps2    | Ral GEF with PH domain and SH3 binding motif 2                                                                                  | NM_023884    |



|              |                                                                                        |              |
|--------------|----------------------------------------------------------------------------------------|--------------|
| Rasgef1a     | RasGEF domain family, member 1A                                                        | NM_027526    |
| Rbmyl1a1     | RNA binding motif protein, Y chromosome, family 1, member A1                           | NM_011253    |
| Rdh19        | retinol dehydrogenase 19                                                               | NM_147222    |
| Reep6        | receptor accessory protein 6                                                           | NM_139292    |
| Rgs10        | regulator of G-protein signalling 10                                                   | NM_026418    |
| Rgs4         | regulator of G-protein signaling 4                                                     | NM_009062    |
| Rgs5         | regulator of G-protein signaling 5                                                     | NM_009063    |
| Rtn2         | reticulon 2 (Z-band associated protein)                                                | NM_013648    |
| Rtn4r        | reticulon 4 receptor                                                                   | NM_022982    |
| Rwdd2a       | RWD domain containing 2A                                                               | NM_027100    |
| S100b        | S100 protein, beta polypeptide, neural                                                 | NM_009115    |
| S1pr3        | sphingosine-1-phosphate receptor 3                                                     | NM_010101    |
| Samd10       | sterile alpha motif domain containing 10                                               | NM_172676    |
| Scd4         | stearoyl-coenzyme A desaturase 4                                                       | NM_183216    |
| Sct          | secretin                                                                               | NM_011328    |
| Sdr39u1      | short chain dehydrogenase/reductase family 39U, member 1                               | NM_001082975 |
| Sdsl         | serine dehydratase-like                                                                | NM_133902    |
| Sema3a       | sema domain, immunoglobulin domain (Ig), short basic domain, secreted, (semaphorin) 3A | NM_009152    |
| Sema3b       | sema domain, immunoglobulin domain (Ig), short basic domain, secreted, (semaphorin) 3B | NM_001042779 |
| Sema3c       | sema domain, immunoglobulin domain (Ig), short basic domain, secreted, (semaphorin) 3C | NM_013657    |
| Sema3g       | sema domain, immunoglobulin domain (Ig), short basic domain, secreted, (semaphorin) 3G | AK129018     |
| Serpinb10-ps | serine (or cysteine) peptidase inhibitor, clade B (ovalbumin), member 10, pseudogene   | NM_198028    |
| Serpinf1     | serine (or cysteine) peptidase inhibitor, clade F, member 1                            | NM_011340    |
| Shc2         | SHC (Src homology 2 domain containing) transforming protein 2                          | NM_001024539 |
| Sigirr       | single immunoglobulin and toll-interleukin 1 receptor (TIR) domain                     | NM_023059    |
| Sla2         | Src-like-adaptor 2                                                                     | NM_029983    |
| Slamf9       | SLAM family member 9                                                                   | NM_029612    |
| Slc11a1      | solute carrier family 11 (proton-coupled divalent metal ion transporters), member 1    | NM_013612    |
| Slc12a5      | solute carrier family 12, member 5                                                     | NM_020333    |
| Slc13a5      | solute carrier family 13 (sodium-dependent citrate transporter), member 5              | NM_001004148 |
| Slc25a45     | solute carrier family 25, member 45                                                    | NM_134154    |
| Slc2a5       | solute carrier family 2 (facilitated glucose transporter), member 5                    | NM_019741    |
| Slc46a3      | solute carrier family 46, member 3                                                     | NM_027872    |
| Slc4a11      | solute carrier family 4, sodium bicarbonate transporter-like, member 11                | NM_001081162 |
| Slx          | Sycp3 like X-linked                                                                    | NM_001136476 |
| Smpd3        | sphingomyelin phosphodiesterase 3, neutral                                             | NM_021491    |
| Sncg         | synuclein, gamma                                                                       | NM_011430    |
| Soat2        | sterol O-acyltransferase 2                                                             | NM_146064    |
| Sostdc1      | sclerostin domain containing 1                                                         | NM_025312    |

|          |                                                                    |              |
|----------|--------------------------------------------------------------------|--------------|
| Sp110    | Sp110 nuclear body protein                                         | NM_175397    |
| Sp140    | Sp140 nuclear body protein                                         | NM_001013817 |
| Srpx     | sushi-repeat-containing protein                                    | NM_016911    |
| Synm     | synemin, intermediate filament protein                             | NM_201639    |
| Synm     | synemin, intermediate filament protein                             | NM_183312    |
| Tbxa2r   | thromboxane A2 receptor                                            | NM_009325    |
| Tbxas1   | thromboxane A synthase 1, platelet                                 | NM_011539    |
| Tesc     | tescalcin                                                          | NM_021344    |
| Tg       | thyroglobulin                                                      | NM_009375    |
| Tle4     | transducin-like enhancer of split 4, homolog of Drosophila E(spl)  | NM_011600    |
| Tmcc3    | transmembrane and coiled coil domains 3                            | NM_172051    |
| Tmem184a | transmembrane protein 184a                                         | NM_001161548 |
| Tmem37   | transmembrane protein 37                                           | NM_019432    |
| Tmem47   | transmembrane protein 47                                           | NM_138751    |
| Tmprss6  | transmembrane serine protease 6                                    | NM_027902    |
| Tnfaip2  | tumor necrosis factor, alpha-induced protein 2                     | NM_009396    |
| Tnnt3    | troponin T3, skeletal, fast                                        | NM_011620    |
| Tnnt3    | troponin T3, skeletal, fast                                        | NM_001163664 |
| Trem2    | triggering receptor expressed on myeloid cells 2                   | NM_031254    |
| Trpv2    | transient receptor potential cation channel, subfamily V, member 2 | NM_011706    |
| Tspan32  | tetraspanin 32                                                     | NM_020286    |
| Tspan32  | tetraspanin 32                                                     | NM_001128080 |
| Tspan8   | tetraspanin 8                                                      | NM_146010    |
| Vipr1    | vasoactive intestinal peptide receptor 1                           | NM_011703    |
| Vit      | vitrin                                                             | NM_028813    |
| Wnt10b   | wingless related MMTV integration site 10b                         | NM_011718    |
| Wnt5b    | wingless-related MMTV integration site 5B                          | NM_009525    |
| Xlr      | X-linked lymphocyte-regulated complex                              | NM_011725    |
|          |                                                                    | AK134871     |
|          |                                                                    | AK078204     |
|          |                                                                    | AK076101     |
|          |                                                                    | AK087744     |
|          |                                                                    | BC028765     |
|          |                                                                    | AK034180     |
|          |                                                                    | BC100507     |
|          |                                                                    | M97158       |
|          |                                                                    | AK011165     |
|          |                                                                    | AK171076     |
|          |                                                                    | AK013632     |
|          |                                                                    | AK145269     |
|          |                                                                    | AF064749     |

---

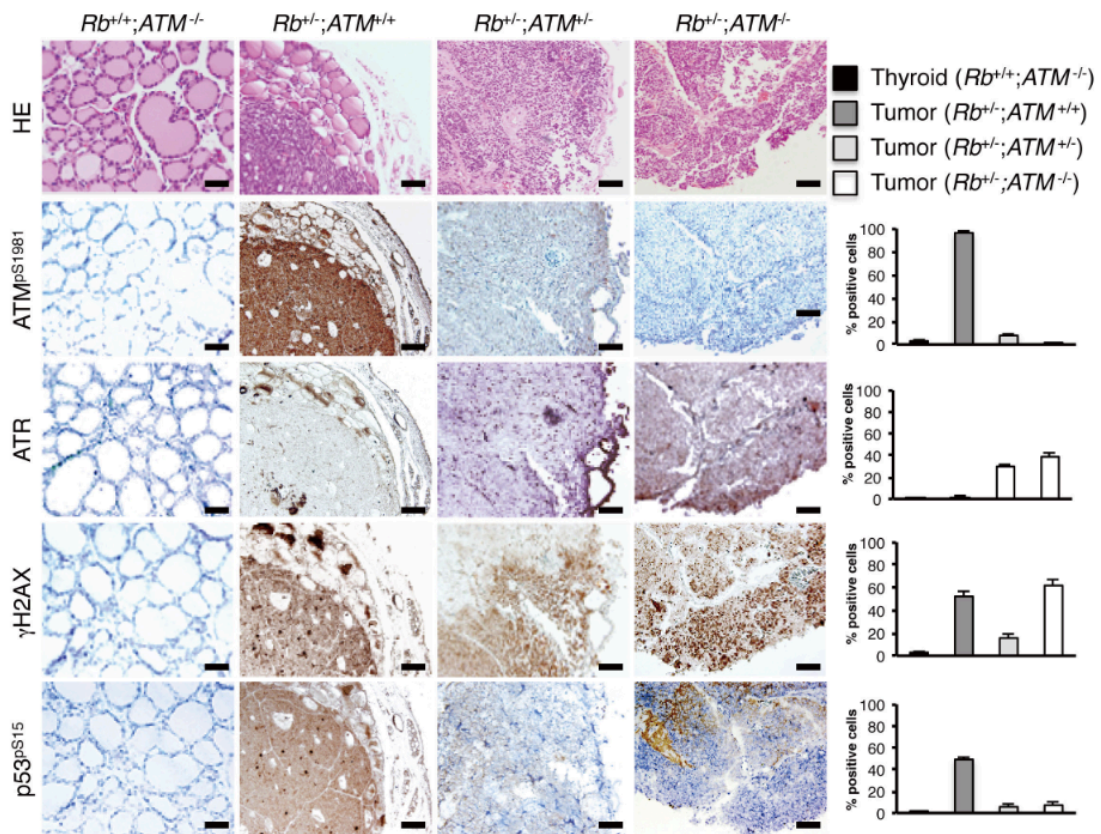

**Fig. S1. Analysis of *Rb*-deficient C cell tumors of various *ATM* genotypes.** Serial sections of thyroid tumors developed in the indicated genotypes of mice were analyzed by hematoxylin-eosin (HE) staining and immunostained with antibodies to the indicated proteins. Frequency of immunopositive cells per 200 normal thyroid or tumor cells was quantified. Columns are mean + SEM. Scale bars: 100  $\mu$ m.

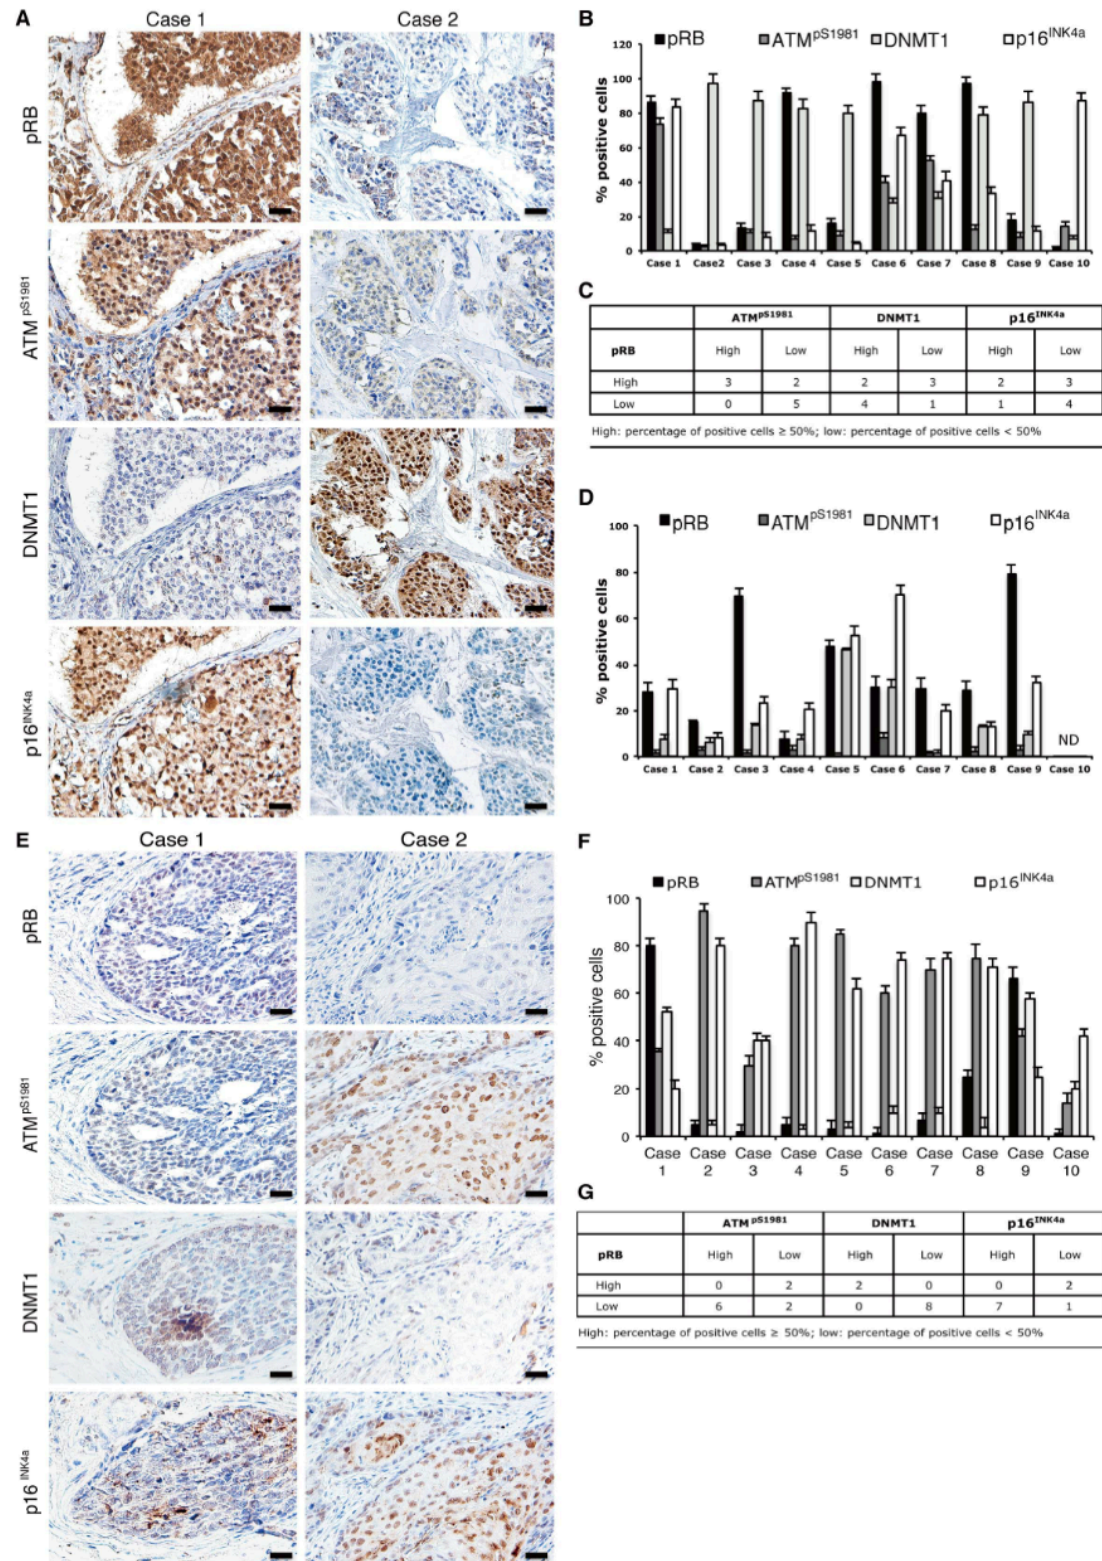

**Fig. S2.** Analysis of human sporadic medullary thyroid carcinomas and esophageal squamous cell carcinomas. (A) Representative micrographs of serial sections of 10 human sporadic medullary thyroid carcinomas (MTCs) immunostained with antibodies to the indicated proteins. (B) Frequency of immunopositive cells per 200

tumor cells in all the cases. **(C)** Classification of cases according to the frequency of immunopositive cells for the indicated proteins. **(D)** Frequency of immunopositive cells per 200 tumor cells in normal thyroid tissues included in the samples were quantified as in B. **(E)** Representative micrographs of serial sections of 10 human esophageal squamous cell carcinomas (SCCs) immunostained with antibodies to the indicated proteins. **(F)** The frequency of immunopositive cells in all the cases. **(G)** Classification of cases according to the frequency of immunopositive cells for the indicated proteins. The cut off value:  $\geq 50\%$ ; high and  $< 50\%$ ; low. Columns are mean + SEM. Scale bars: 100  $\mu\text{m}$ .

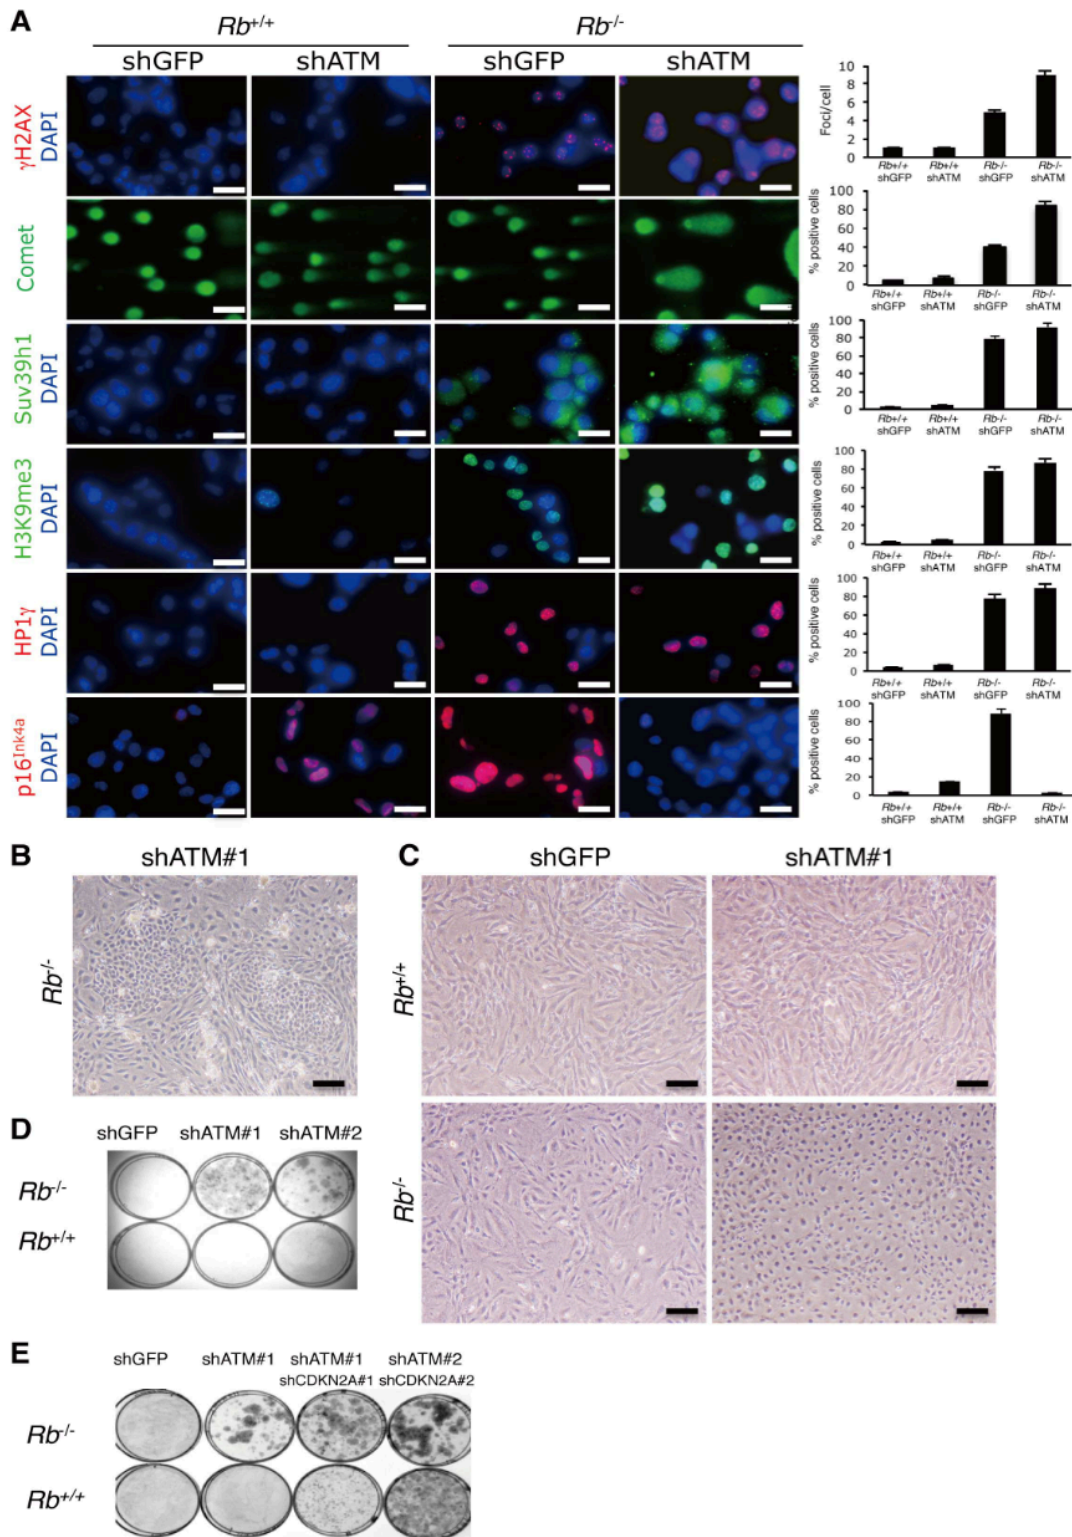

**Fig. S3.** IF analysis and phenotypic changes induced by ATM depletion from *Rb*-deficient MEFs. (A) MEFs were infected with lentiviruses expressing shRNAs that target the indicated genes, selected with 4  $\mu$ g/ml puromycin for 5 days, cultivated under normal conditions for additional 12 days, and immunostained with antibodies

to the indicated proteins. The frequency of immunopositive cells per 200 cells was quantified. Columns are mean + SEM. Scale bars: 100  $\mu$ m. **(B)** Micrographs of *Rb*<sup>-/-</sup> MEFs infected with lentivirus expressing shRNA that targets ATM, and cultured for 5 days without drug selection. Note that cells with different morphology appeared in culture. **(C)** Micrographs of MEFs of the indicated genotypes that were infected with lentiviruses expressing shRNA targeting the indicated genes and selected with 4 $\mu$ g/ml puromycin for 5 days. **(D and E)**, Colony formation assay, MEFs of the indicated genotypes were infected with lentiviruses expressing shRNAs targeting the indicated genes and selected with 4 $\mu$ g/ml puromycin for 5 days and 1.0x10<sup>3</sup> cells were plated onto 60 mm dish, and cultured for 15 days. Scale bars: 100  $\mu$ m.

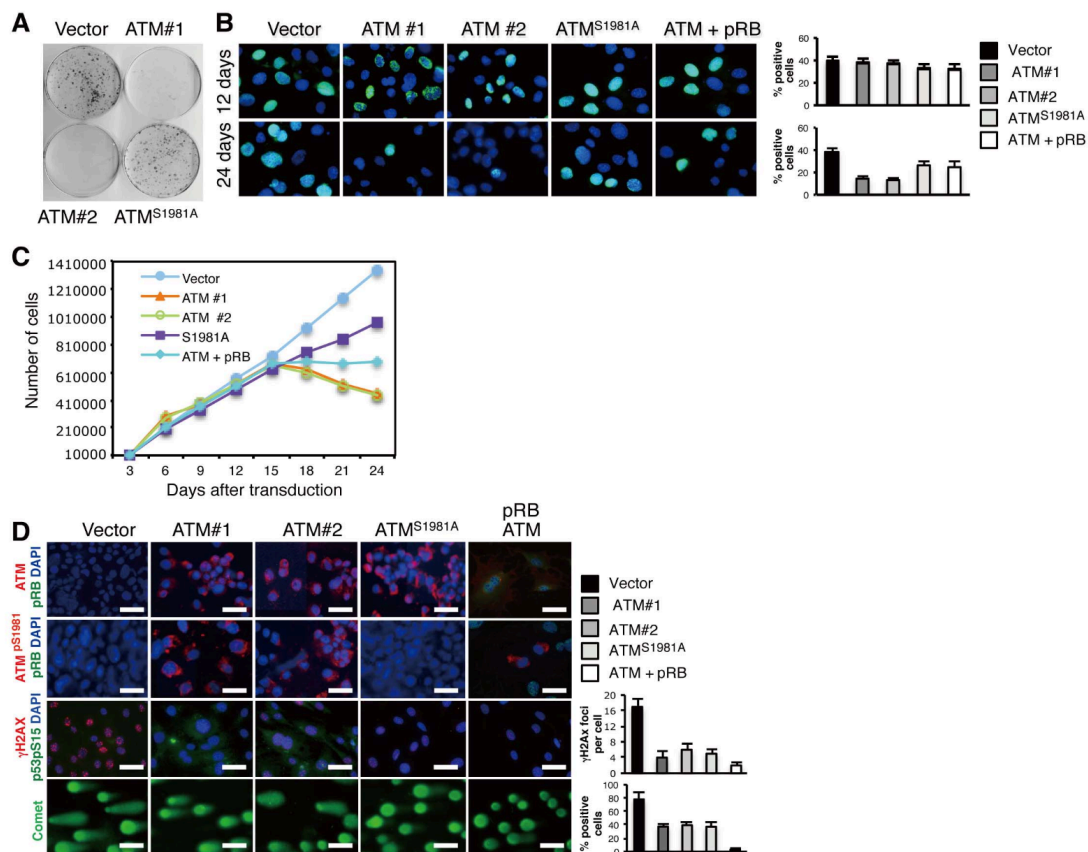

**Fig. S4.** Phenotypic changes in *Rb*<sup>-/-</sup>; *ATM*<sup>-/-</sup> MEFs induced by reintroduction of ATM and pRb. MEFs were nucleofected with vectors expressing the indicated proteins, selected with 4  $\mu$ g/ml puromycin and/or 8  $\mu$ g/ml blasticidin S for 5 days, cloned and analyzed. **(A)** Colony formation, 1.0 x10<sup>3</sup> cells onto 60 mm dish and cultured for 15

days. (B) BrdU incorporation, cells were cultured under normal culture conditions and analyzed at the indicated days after nucleofection. (C) Proliferation of *Rb*<sup>-/-</sup>; *ATM*<sup>-/-</sup> MEFs nucleofected with vectors expressing the indicated proteins. (D) IF analysis with antibodies to the indicated proteins, Commet assay of representative clones are indicated. The frequency of positive cells per 200 cells was quantified. Columns are mean + SEM. Scale bars: 100  $\mu$ m.

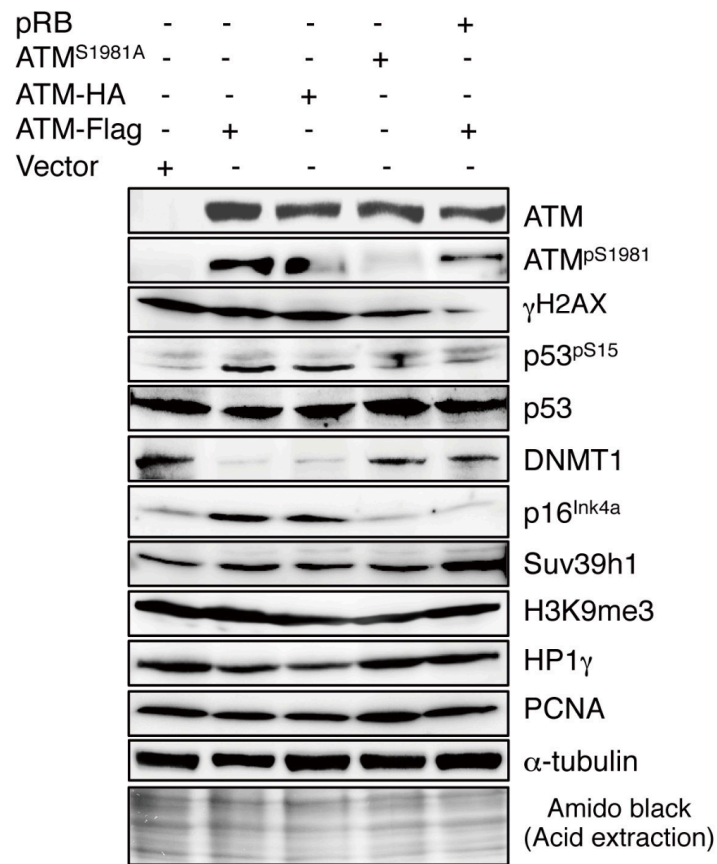

**Fig. S5.** Immunoblotting analysis of *Rb*-deficient *ATM*<sup>-/-</sup> C cell adenocarcinoma cells. Cells were nucleofected with vectors expressing the indicated proteins, selected with 4  $\mu$ g/ml puromycin and 8  $\mu$ g/ml blasticidin S for 5 days, and analyzed with antibodies to the indicated proteins.



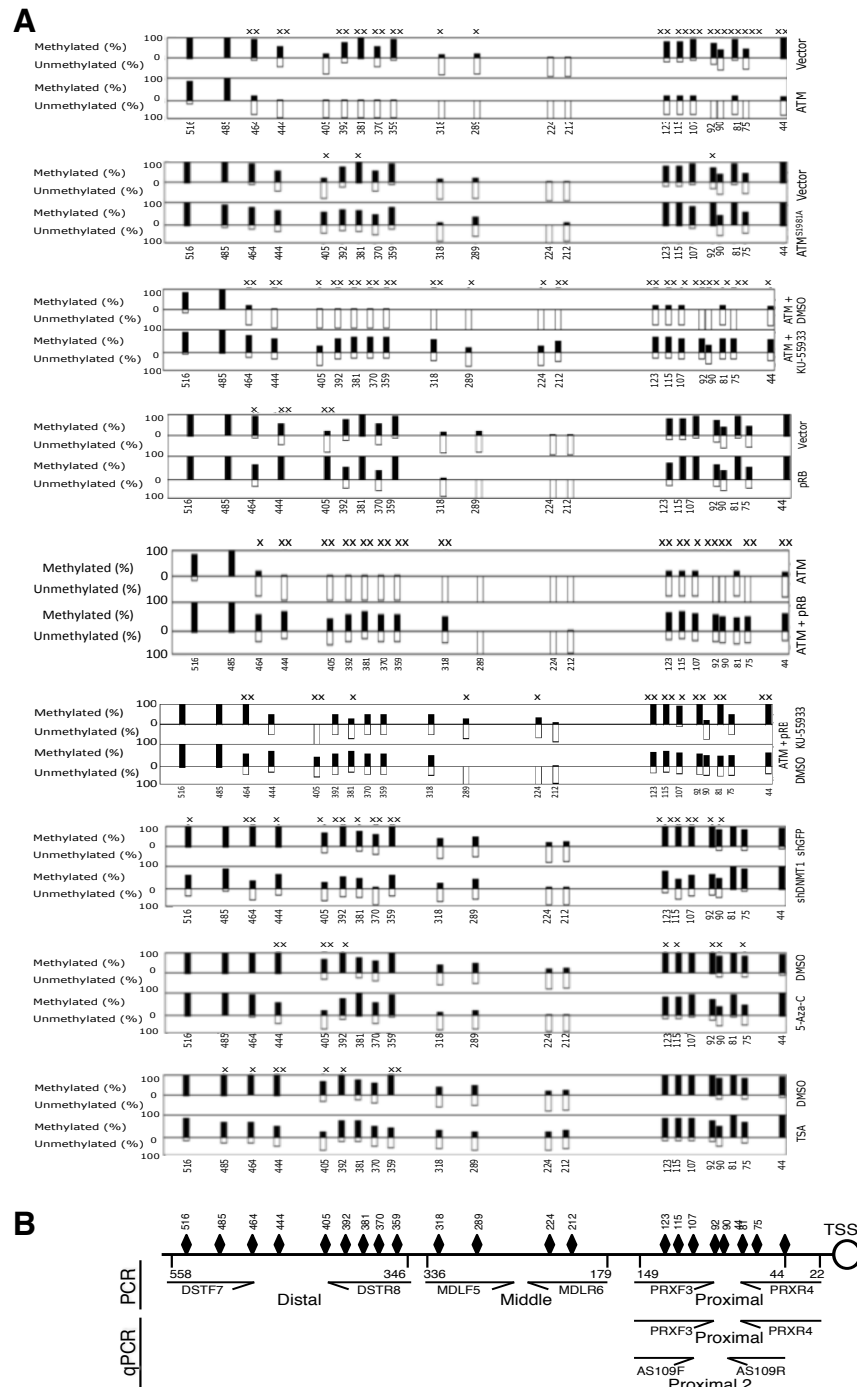

**Fig. S6.** Analysis of the *Ink4a* promoter. **(A)** Statistical analysis of the frequency of methylated CpG nucleotides, and their location in the *Ink4a* promoter region in *Rb*<sup>-/-</sup>; *ATM*<sup>-/-</sup> MEFs under various conditions. Columns indicate the percentage of methylated (filled) and unmethylated (unfilled) CpG nucleotides in the *Ink4a* promoter region (-44 to -516) of cells analyzed in Fig. 3c. Data represents average of more than 20 clones. X: p-value <0.1, XX: p-value <0.01 in each pair of comparison provided by QUMA program. **(B)** A schematic presentation of the structure of mice

*Ink4a* promoter region (-22 to -558) upstream of the transcription start site (TSS) and location of CpG nucleotides. Shown are the locations of primers (arrows) used in PCR or qPCR amplification of CpG nucleotide-rich regions in ChIP analysis.

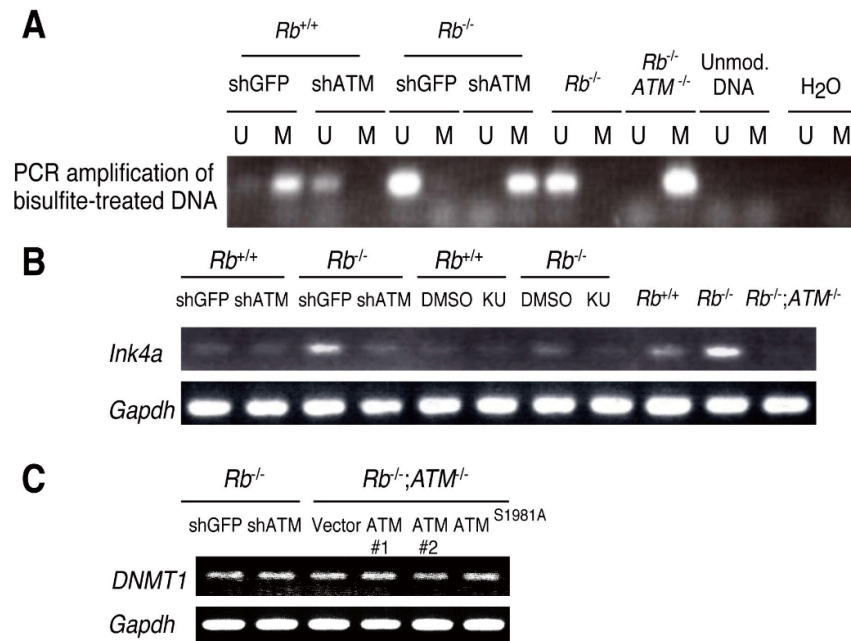

**Fig. S7.** Effects of the status of pRb and ATM on the transcription of *Ink4a* and *DNMT1*. **(A)** Analysis of the *Ink4a* promoter by bisulfite PCR. MEFs of the indicated genotypes, or those infected with lentiviruses expressing shRNAs that target the indicated genes, and selected with 4 $\mu$ g/ml puromycin for 5 days, were cultured for additional 10 days under normal conditions and analyzed. Bisulfite-treated DNA was amplified with the primers specific for unmethylated (U) or methylated (M) allele shown in Table S2. **(B)** MEFs of the indicated genotypes were infected with lentiviruses expressing shRNAs that target the indicated genes, selected with 4 $\mu$ g/ml puromycin for 5 days, cultured for additional 10 days under normal conditions; or treated with 10 mM KU-55933 (KU) or DMSO for 6 days. Resultant cells were analyzed by RT-PCR for the indicated genes. **(C)** MEFs of the indicated genotypes were infected with lentiviruses expressing shRNAs that target the indicated genes, or

transfected with vectors expressing the indicated proteins, selected with 4  $\mu\text{g/ml}$  puromycin for 5 days, cultured for additional 10 days under normal conditions, and analyzed by RT-PCR for the indicated genes.

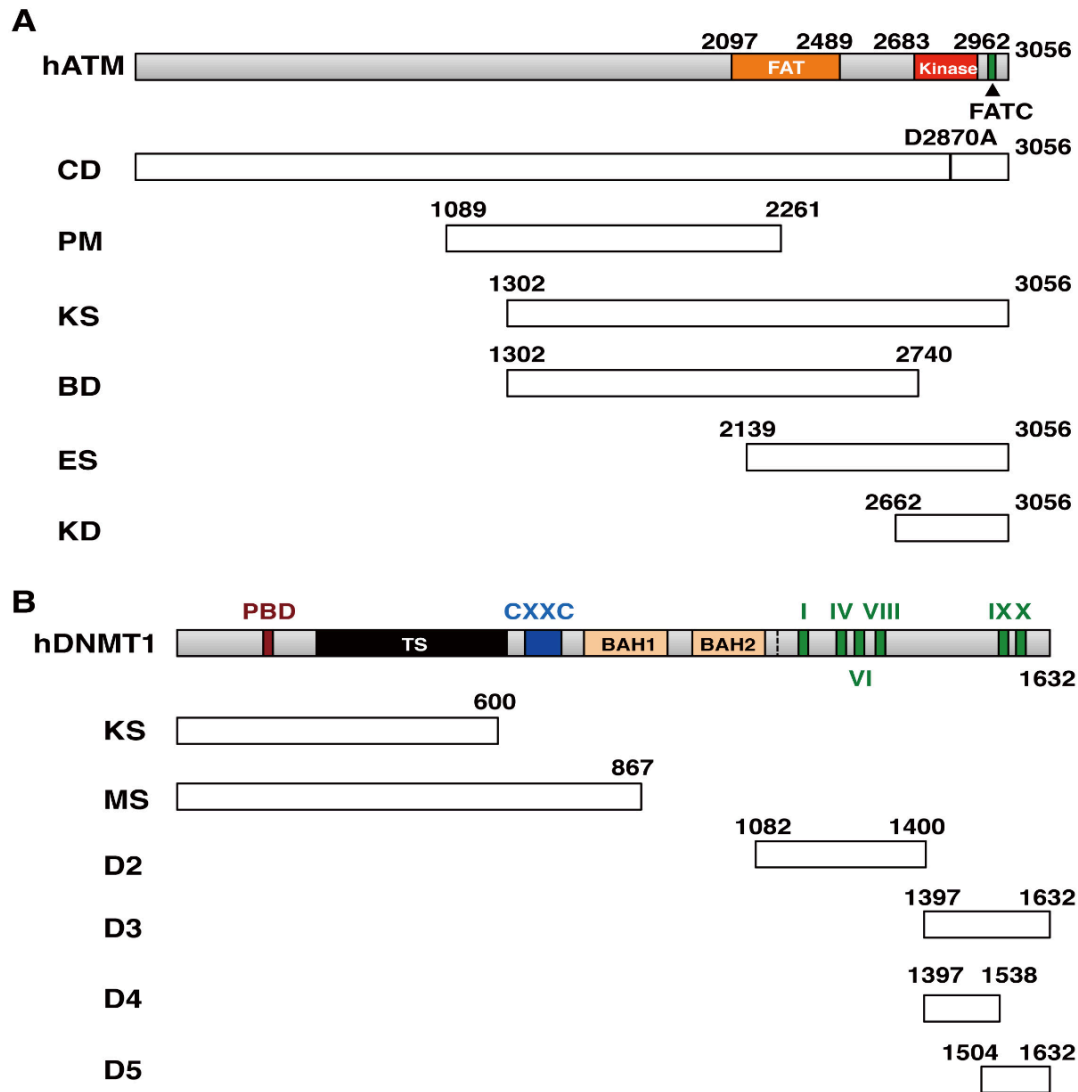

**Fig. S8.** A schematic presentation of the structure of human ATM (hATM) and DNMT1 (hDNMT1) proteins and their deletion mutants used in this study. **(A)** CD: D2870A conversion leading to reduced kinase activity; PM: containing a region nested by PstI and MscI restriction sites; KS: KpnI-SmaI; BD: KpnI-PstI; ES: EcoRI-SmaI; KD: kinase domain (aa2662-aa3056). **(B)** KS and MS were Flag-tagged, and D2, D3, D4 and D5 were HA-tagged. The DNA fragments coding these truncated proteins were inserted into pEF-BOS vector.

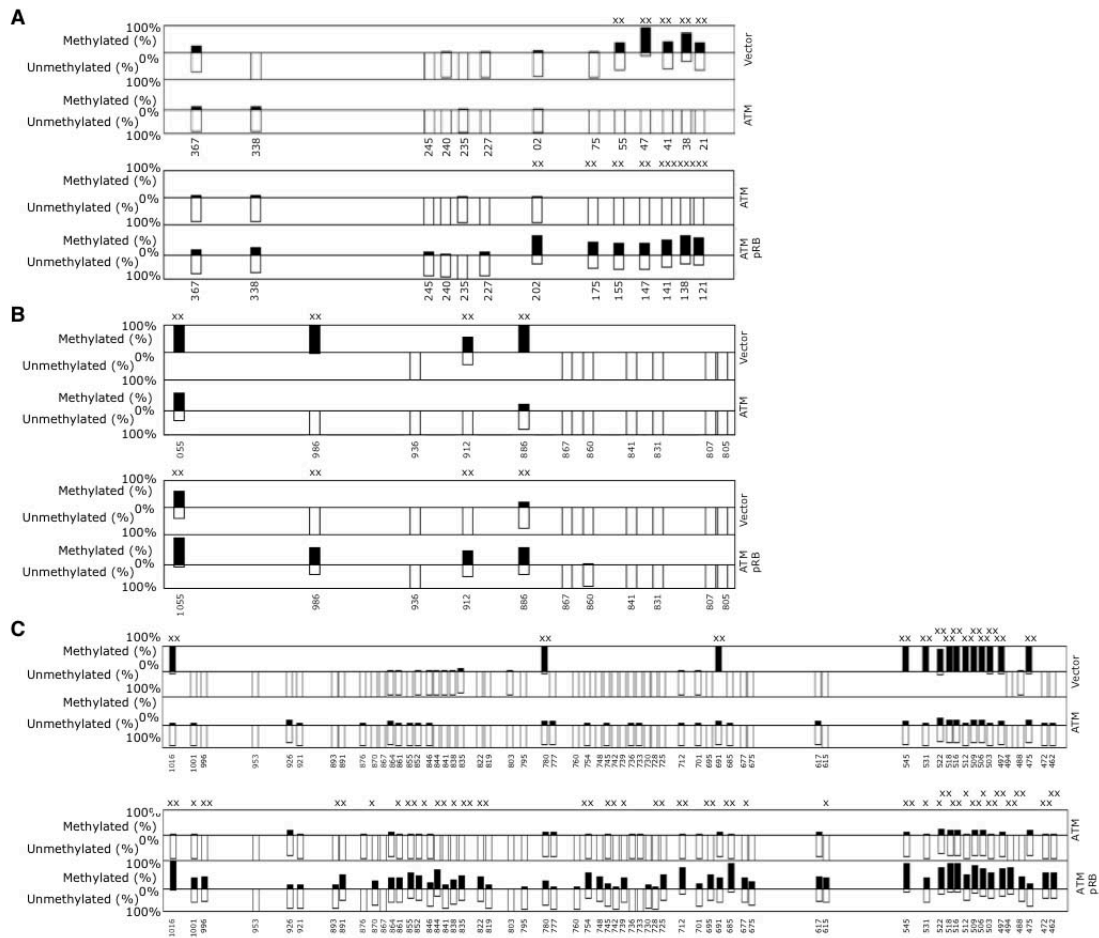

**Fig. S9.** Statistical analysis of the frequency of methylated CpG nucleotides and their location in the promoters of three representative cancer related genes in *Rb<sup>-/-</sup>;ATM<sup>-/-</sup>* MEFs with different status of pRB and ATM. **(A)** MEFs were transduced with vectors expressing the indicated proteins, selected with 4  $\mu\text{g/ml}$  puromycin and/or 8  $\mu\text{g/ml}$  blasticidin S for 5 days, and analyzed by bisulfite sequencing after 10 days of culturing under normal conditions. Shown is the percentage of methylated and unmethylated CpG nucleotides in the *Shc2* promoter region (-121 to -367) under different conditions. **(B)** MEFs were prepared and analyzed as in (A) Shown is the percentage of methylated and unmethylated CpG nucleotides in the *FoxO6* promoter region (-805 to -1055) under different conditions. **(C)** MEFs were prepared and analyzed as in (A). Shown is the percentage of methylated and unmethylated CpG nucleotides in the *Noggin* promoter region (-462 to -1016) under different conditions. Columns indicate the percentage of methylated (filled) and unmethylated (unfilled) CpG nucleotides. Data represents average of more than 15 clones. X: p-value <0.1, XX: p-value <0.01 given by QUMA program.
